# Supplementary material
Source: publisher site journal article supplement (https://www.dovepress.com/article/404786)
Supplement: Supplementary file 1 [file get_supplementary_file.php]

Supplementary Table 1: Classification performance of clinical model and fusion model training set and verification set partition from 8:2 to 6:4

| Model | Clinical data | | | |  |
| --- | --- | --- | --- | --- | --- |
| Accuracy | Recall | AUC | F1 | Rate of change |
| LR* | 0.661 | 0.804 | 0.760 | 0.722 | -0.09% |
| LR** | 0.72 | 0.647 | 0.759 | 0.678 |  |
| SVM* | 0.756 | 0.804 | 0.813 | 0.723 | -3.84% |
| SVM** | 0.702 | 0.813 | 0.782 | 0.752 |  |
| Catboost* | 0.738 | 0.837 | 0.852 | 0.778 | -3.05% |
| Catboost** | 0.768 | 0.634 | 0.826 | 0.713 |  |
| Fully connected network* | 0.692 | 0.733 | 0.728 | 0.717 | -3.23% |
| Fully connected network** | 0.672 | 0.671 | 0.704 | 0.683 |  |
| *:The training set and verification set were divided by 8:2 as experiment A serie **: The training set and verification set were divided by 6:4 as experiment B series.  Rate of change: AUC difference rate from Experiment A series to Experiment B series | | | | | |

Supplementary Table 2**:** Classification performance of image model and fusion model training set and verification set partition from 8:2 to 6:4

| Model | Image data | | | |  |  | Image data + clinical data | | | |  |
| --- | --- | --- | --- | --- | --- | --- | --- | --- | --- | --- | --- |
| Accuracy | Recall | AUC | F1 | Rate of change |  | Accuracy | Recall | AUC | F1 | Rate of change |
| Resnet50* | 0.723 | 0.576 | 0.757 | 0.65 | -7.79% |  | 0.725 | 0.74 | 0.788 | 0.717 | -6.85% |
| Resnet50** | 0.701 | 0.478 | 0.698 | 0.597 |  |  | 0.689 | 0.394 | 0.734 | 0.537 |  |
| Resnet101* | 0.709 | 0.641 | 0.767 | 0.663 | -13.08% |  | 0.774 | 0.701 | 0.809 | 0.745 | -14.34% |
| Resnet101** | 0.66 | 0.5526 | 0.6667 | 0.6 |  |  | 0.672 | 0.49 | 0.693 | 0.578 |  |
| *: The training set and verification set were divided by 8:2 as experiment A series **: The training set and verification set were divided by 6:4 as experiment B series. Rate of change: AUC difference rate from Experiment A series to Experiment B series | | | | | | | | | | | |
